# Supplementary material for: Does Very Poor Performance Status Systematically Preclude Single Agent Anti-PD-1 Immunotherapy? A Multicenter Study of 35 Consecutive Patients
Source: PubMed Central journal article supplement (PMC7958129; doi:10.3390/cancers13051040), 2021-03-02
Supplement: cancers-13-01040-s001.pdf [file cancers-13-01040-s001.pdf]

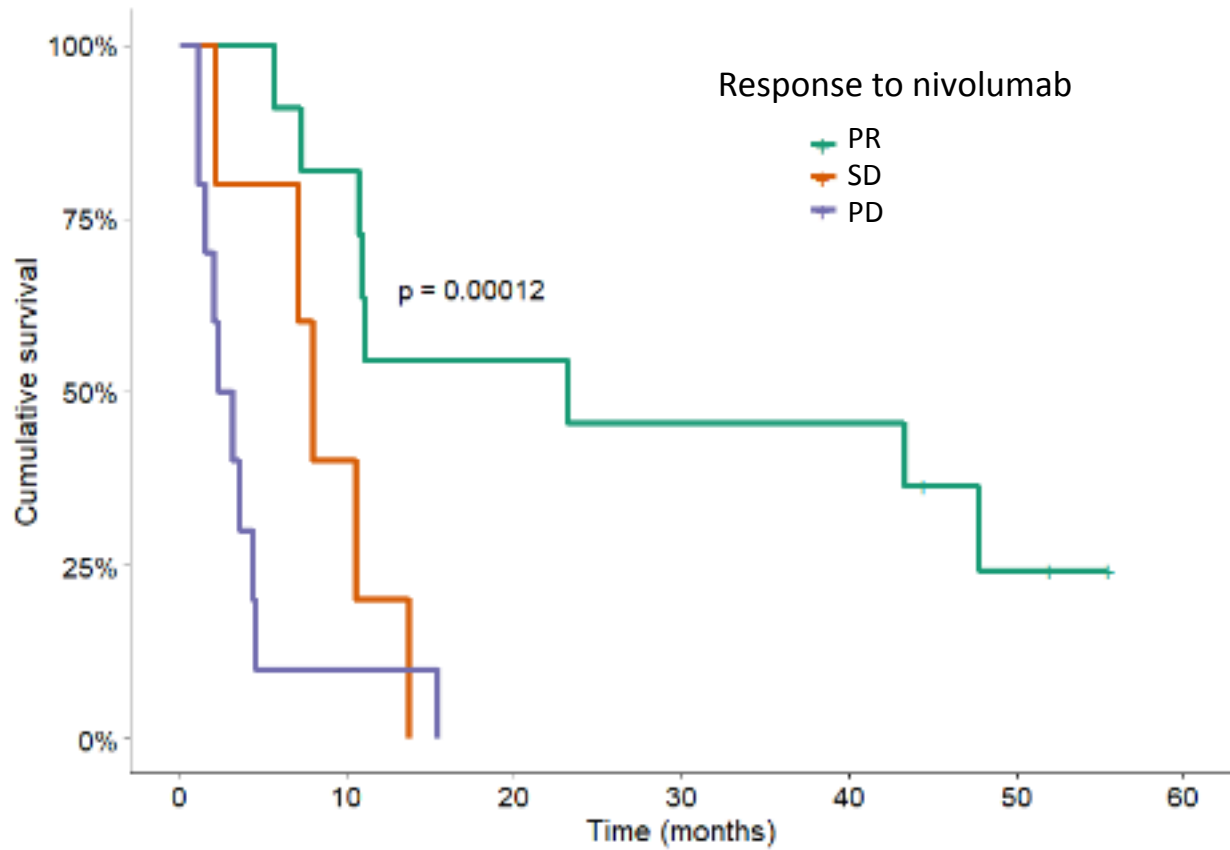

Number at risk

| Response to nivolumab | 0  | 10 | 20 | 30 | 40 | 50 | 60 |
|-----------------------|----|----|----|----|----|----|----|
| PR                    | 11 | 9  | 6  | 5  | 5  | 2  | 0  |
| SD                    | 5  | 2  | 0  | 0  | 0  | 0  | 0  |
| PD                    | 10 | 1  | 0  | 0  | 0  | 0  | 0  |

Time (months)

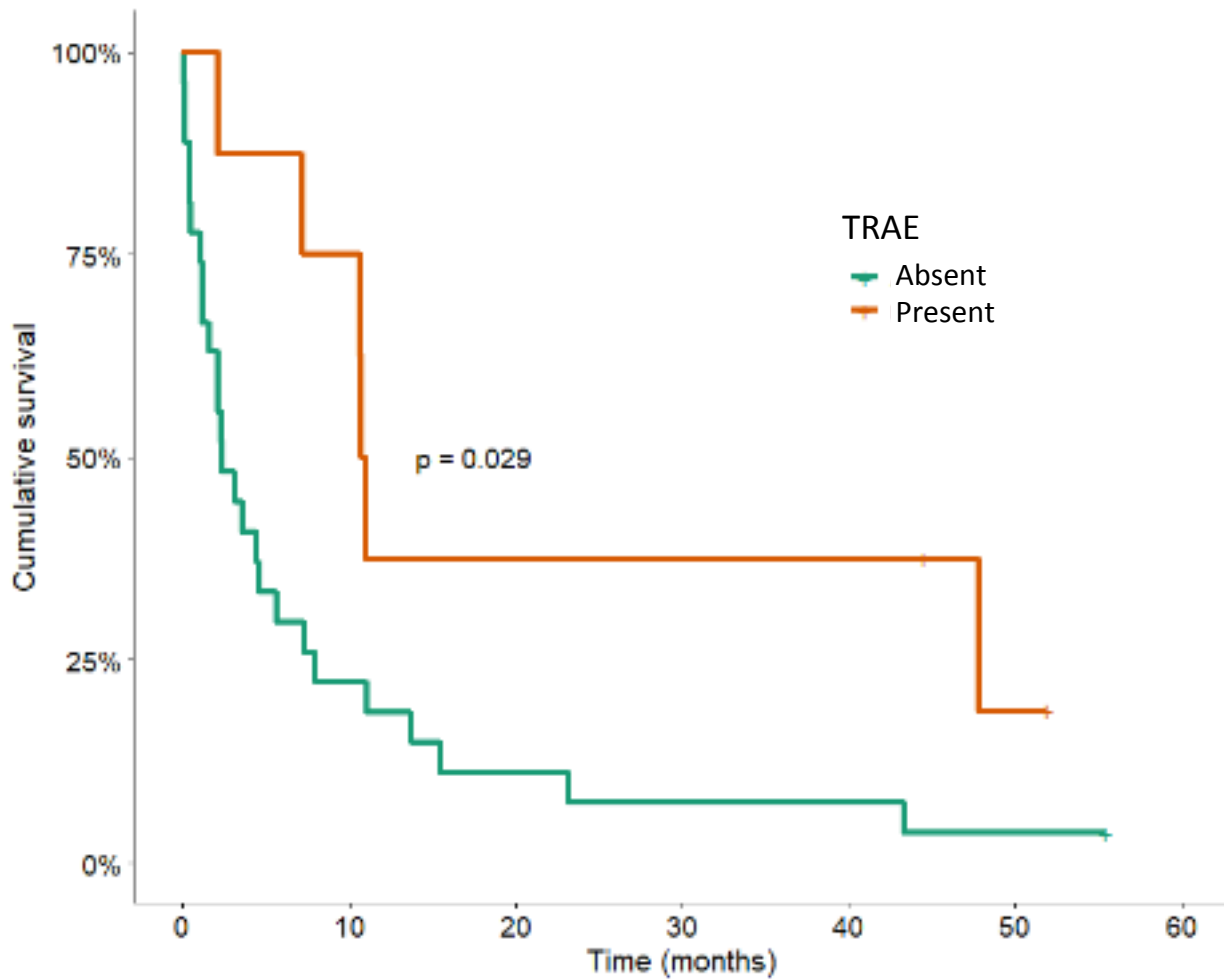

Number at risk

| TRAE    | 0  | 10 | 20 | 30 | 40 | 50 | 60 |
|---------|----|----|----|----|----|----|----|
| Absent  | 27 | 6  | 3  | 2  | 2  | 1  | 0  |
| Present | 8  | 6  | 3  | 3  | 3  | 1  | 0  |

Time (months)



**Supplementary Data Table 1. Overall Response Rate by PD-L1 Status**

|                               | Patients |    | PD-L1 status (TPS) |    |      |    | p |
|-------------------------------|----------|----|--------------------|----|------|----|---|
|                               | N = 34*  |    | < 1%               |    | ≥ 1% |    |   |
|                               | n        | %  | n                  | %  | N    | %  |   |
| <b>Objective response</b>     | 11       | 32 | 2                  | 18 | 9    | 39 |   |
| <b>No objective response†</b> | 23       | 68 | 9                  | 82 | 14   | 61 |   |

\*In one case, tumor material was insufficient, and the analysis could thus not be performed.

†In the intent-to-treat series, no objective response included stable disease and progressive disease in evaluable tumors and non-evaluable tumors regardless of the cause.

PD-L1, programmed death ligand 1; TPS, tumor proportion score.

| Variables                             | N  | Univariable analysis |           |       |             |                             | Multivariable analysis |     |          |              |
|---------------------------------------|----|----------------------|-----------|-------|-------------|-----------------------------|------------------------|-----|----------|--------------|
|                                       |    | Median OS (mo)       | 95% CI    | HR    | 95% CI      | p value (Log Rank)          | Wald                   | aHR | 95% CI   | p value      |
| <b>* Age (years)</b>                  | 35 |                      |           |       |             |                             |                        |     |          |              |
| < 65                                  | 16 | 5.7                  | 0.4-11.0  | -     |             | 0.092                       |                        |     |          |              |
| ≥ 65                                  | 19 | 2.1                  | 1.4-2.9   | 1.8   | 0.9-3.7     |                             |                        |     |          |              |
| <b>Gender</b>                         | 35 |                      |           |       |             |                             |                        |     |          |              |
| Female                                | 12 | 7.2                  | 0-15.9    | -     |             | 0.729                       |                        |     |          |              |
| Male                                  | 23 | 3.6                  | 0.4-6.8   | 1.1   | 0.6-2.4     |                             |                        |     |          |              |
| <b>* Smoking status (PY)</b>          | 34 |                      |           |       |             |                             |                        |     |          |              |
| ≥ 20                                  | 27 | 5.7                  | 0.8-10.5  | -     |             | <b>0.014</b>                | 8.6                    | -   | -        | <b>0.003</b> |
| < 20                                  | 7  | 1.6                  | 0-4.6     | 2.9   | 1.2-7.0     |                             |                        | 4.8 | 1.7-13.8 |              |
| <b>Number of metastatic sites</b>     | 34 |                      |           |       |             |                             |                        |     |          |              |
| < 3                                   | 22 | 4.4                  | 0-13.9    | -     |             | 0.120                       |                        |     |          |              |
| ≥ 3                                   | 12 | 3.6                  | 0-7.7     | 1.8   | 0.9-3.9     |                             |                        |     |          |              |
| <b>* Liver metastasis</b>             | 34 |                      |           |       |             |                             |                        |     |          |              |
| No                                    | 25 | 7.3                  | 1.7-12.9  | -     |             | <b>0.047</b>                |                        |     |          |              |
| Yes                                   | 9  | 2.1                  | 0.5-3.8   | 2.2   | 1.0-5.1     |                             |                        |     |          |              |
| <b>* Brain metastasis</b>             | 34 |                      |           |       |             |                             |                        |     |          |              |
| No                                    | 24 | 8.0                  | 0.4-15.6  | -     |             | <b>0.003</b>                | 10.4                   | -   | -        | <b>0.001</b> |
| Yes                                   | 10 | 2.1                  | 0.6-3.6   | 3.5   | 1.5-8.5     |                             |                        | 5.2 | 1.9-14.3 |              |
| <b>Histological type</b>              | 35 |                      |           |       |             |                             |                        |     |          |              |
| Adenocarcinoma                        | 23 | 4.6                  | 0.7-8.5   | -     |             |                             |                        |     |          |              |
| Squamous cell carcinoma               | 7  | 3.6                  | 0.4-6.9   | 0.9   | 0.4-2.1     | 0.947                       |                        |     |          |              |
| Other                                 | 5  | 0.5                  | 0.3-0.7   | 1.0   | 0.3-2.8     |                             |                        |     |          |              |
| <b>PD-L1 status (TPS)</b>             | 34 |                      |           |       |             |                             |                        |     |          |              |
| ≥ 50                                  | 14 | 4.6                  | 0-9.2     | -     |             |                             |                        |     |          |              |
| 1-49                                  | 9  | 7.2                  | 0-22.1    | 1.3   | 0.5-3.1     | 0.673                       |                        |     |          |              |
| 0                                     | 11 | 2.3                  | 0.7-4.0   | 1.5   | 0.6-3.3     |                             |                        |     |          |              |
| <b>KRAS mutation</b>                  | 32 |                      |           |       |             |                             |                        |     |          |              |
| Yes                                   | 8  | 7.3                  | 0-14.6    | -     |             | 0.223                       |                        |     |          |              |
| No                                    | 24 | 2.3                  | 0.5-4.1   | 1.7   | 0.7-4.0     |                             |                        |     |          |              |
| <b>First-line therapy</b>             | 35 |                      |           |       |             |                             |                        |     |          |              |
| Chemotherapy (platinum doublet)       | 29 | 4.6                  | 0.9-8.2   | -     |             | 0.230                       |                        |     |          |              |
| ICI (Single anti-PD1, Nivolumab)      | 6  | 0.5                  | 0-2.8     | 1.7   | 0.7-4.3     |                             |                        |     |          |              |
| <b>PS before nivolumab initiation</b> | 35 |                      |           |       |             |                             |                        |     |          |              |
| 3                                     | 29 | 4.4                  | 1.9-6.9   | -     |             | 0.941                       |                        |     |          |              |
| 4                                     | 6  | 1.1                  | 0-9.3     | 1.0   | 0.4-2.7     |                             |                        |     |          |              |
| <b>Best PS under nivolumab</b>        | 35 |                      |           |       |             |                             |                        |     |          |              |
| 0                                     | 5  | NR                   | -         | -     |             |                             |                        |     |          |              |
| 1                                     | 4  | 23.2                 | 0-60.2    | 2.7   | 0.5-15.1    |                             |                        |     |          |              |
| 2                                     | 5  | 7.3                  | 7.1-7.5   | 8.3   | 1.3-53.4    | <b>&lt; 10<sup>-6</sup></b> |                        |     |          |              |
| 3                                     | 19 | 2.1                  | 1.3-2.9   | 23.0  | 4.1-128.6   |                             |                        |     |          |              |
| 4                                     | 2  | 0.1                  | -         | 201.5 | 17.1-2370.2 |                             |                        |     |          |              |
| <b>Response to nivolumab</b>          | 35 |                      |           |       |             |                             |                        |     |          |              |
| Partial response                      | 11 | 23.2                 | 0-58.2    | -     |             |                             |                        |     |          |              |
| Stable disease                        | 5  | 8.0                  | 6.2-9.8   | 3.8   | 1.1-13.6    |                             |                        |     |          |              |
| Progressive disease                   | 10 | 2.3                  | 0.6-4.0   | 8.7   | 2.8-26.6    | <b>&lt; 10<sup>-7</sup></b> |                        |     |          |              |
| Not evaluable                         | 9  | 0.4                  | 0.3-0.5   | 60.5  | 13.8-264.6  |                             |                        |     |          |              |
| <b>Immune-related adverse events</b>  | 35 |                      |           |       |             |                             |                        |     |          |              |
| No                                    | 27 | 2.3                  | 0.6-4.1   | -     |             |                             |                        |     |          |              |
| Yes                                   | 8  | 10.7                 | 10.3-11.2 | 0.4   | 0.2-0.9     | <b>0.029</b>                |                        |     |          |              |

**Supplementary Table 2.** Detailed univariable (Kaplan-Meier) and multivariable analysis (Cox proportional hazards) results.

\* variable introduced in multivariable analysis

OS, overall survival

95% CI, 95% confidence interval

HR, hazard ratio

aHR, adjusted hazard ratio

NR, not reached

PY, pack-years

PD-L1, programmed death ligand 1

TPS, tumor proportion score

KRAS, Kirsten rat sarcoma oncogene

PS, Performance status

NSCLC, non-small cell lung cancer
